# Supplementary material for: Proteomics and liquid biopsy characterization of human EMT-related metastasis in colorectal cancer
Source: Research Square preprint supplement (doi:10.21203/rs.3.rs-464010/v1), 2021-04-28
Supplement: Supplementary file 1 [file 5304aff5f16bf0fe9724973b.docx]

**Table 1**

| **Group** | **Accession** | **Protein Descriptions** | **Genes** | **P-value** | **log2(FC)** | **FC** |
| --- | --- | --- | --- | --- | --- | --- |
| **P-Liver** | P61981 | 14-3-3 protein gamma | YWHAG | 0.04837044 | -0.3536454 | 0.78260412 |
| Q9HB19 | Pleckstrin homology domain-containing family A member 2 | PLEKHA2 | 0.04964069 | -0.3344951 | 0.79306162 |
| Q9UJZ1 | Stomatin-like protein 2, mitochondrial | STOML2 | 0.01557449 | -0.3121591 | 0.80543545 |
| P25786 | Proteasome subunit alpha type-1 | PSMA1 | 0.03543295 | -0.2865902 | 0.81983747 |
| P05388 | 60S acidic ribosomal protein P0 | RPLP0 | 0.01316079 | -0.2650014 | 0.83219791 |
| Q9HC84 | Mucin-5B | MUC5B | 0.00024848 | 6.75944858 | 108.341982 |
| Q13361 | Microfibrillar-associated protein 5 | MFAP5 | 0.00100573 | 6.7806132 | 109.943096 |
| Q02817 | Mucin-2 | MUC2 | 0.00063923 | 6.97120644 | 125.470678 |
| Q9Y6R7 | IgGFc-binding protein | FCGBP | 0.00069395 | 7.93537264 | 244.78522 |
| A8K7I4 | Calcium-activated chloride channel regulator 1 | CLCA1 | 3.5388E-05 | 8.39447066 | 336.501858 |
| **Ca-P** | Q6YN16 | Hydroxysteroid dehydrogenase-like protein 2 | HSDL2 | 0.01743211 | -0.3207966 | 0.80062768 |
| P48960 | CD97 antigen | CD97 | 0.03155451 | -0.315414 | 0.80362036 |
| P06396 | Gelsolin | GSN | 0.00632453 | -0.3053187 | 0.80926345 |
| Q6IBS0 | Twinfilin-2 | TWF2 | 0.00308106 | -0.3020085 | 0.81112237 |
| P61224 | Ras-related protein Rap-1b | RAP1B | 0.04448249 | -0.2966131 | 0.81416152 |
| Q8WXX5 | DnaJ homolog subfamily C member 9 | DNAJC9 | 2.6696E-05 | 3.57457006 | 11.9138687 |
| P04626 | Receptor tyrosine-protein kinase erbB-2 | ERBB2 | 0.04994159 | 3.73757007 | 13.3389211 |
| Q96HR9 | Receptor expression-enhancing protein 6 | REEP6 | 8.3899E-07 | 3.99504401 | 15.9451306 |
| P25815 | Protein S100-P | S100P | 0.01041157 | 4.34222782 | 20.2834031 |
| P36952 | Serpin B5 | SERPINB5 | 0.00010587 | 5.37891726 | 41.6116981 |
| **Ca-Liver** | Q96HY6 | DDRGK domain-containing protein 1 | DDRGK1 | 0.01464612 | -0.3837267 | 0.76645516 |
| Q8IUI8 | Cytokine receptor-like factor 3 | CRLF3 | 0.04347054 | -0.3198155 | 0.80117234 |
| P30101 | Protein disulfide-isomerase A3 | PDIA3 | 0.04263613 | -0.3150196 | 0.80384006 |
| P53701 | Cytochrome c-type heme lyase | HCCS | 0.00432356 | -0.3002694 | 0.81210075 |
| Q9P2E9 | Ribosome-binding protein 1 | RRBP1 | 0.03270534 | -0.279566 | 0.82383883 |
| Q9Y2Y8 | Proteoglycan 3 | PRG3 | 7.8274E-05 | 4.32338101 | 20.0201518 |
| Q9HC84 | Mucin-5B | MUC5B | 0.00546258 | 4.38534833 | 20.8988019 |
| Q02817 | Mucin-2 | MUC2 | 0.00495672 | 4.65779872 | 25.2427769 |
| Q9Y6R7 | IgGFc-binding protein | FCGBP | 0.00876362 | 5.77892337 | 54.9071975 |
| A8K7I4 | Calcium-activated chloride channel regulator 1 | CLCA1 | 0.0229285 | 6.12830668 | 69.9526437 |

**Table 2**

| **Group** | **Accession** | **Protein Descriptions** | **Genes** | **P-value** | **log2(FC)** | **FC** |
| --- | --- | --- | --- | --- | --- | --- |
| **P-Liver** | P12110 | Collagen alpha-2(VI) chain | COL6A2 | 0.01856739 | 1.69342651 | 3.23423949 |
| P12109 | Collagen alpha-1(VI) chain | COL6A1 | 0.01186536 | 1.81565269 | 3.52018851 |
| P07585 | Decorin | DCN | 0.00867938 | 2.92784228 | 7.60971424 |
| Q9HAV0 | Guanine nucleotide-binding protein subunit beta-4 | GNB4 | 0.00632851 | 2.68446268 | 6.42841329 |
| P35555 | Fibrillin-1 | FBN1 | 0.02235507 | 2.25683774 | 4.77942724 |
| P55268 | Laminin subunit beta-2 | LAMB2 | 0.0291912 | 2.13347239 | 4.38772281 |
| Q6NZI2 | Caveolae-associated protein 1 | CAVIN1 | 0.00372102 | 2.1071161 | 4.30829219 |
| P04275 | von Willebrand factor | VWF | 0.00805119 | 2.09530548 | 4.27316634 |
| P59768 | Guanine nucleotide-binding protein G(I)/G(S)/G(O) subunit gamma-2 | GNG2 | 0.00021779 | 1.71825438 | 3.2903804 |
| P12111 | Collagen alpha-3(VI) chain | COL6A3 | 0.03702155 | 1.63955453 | 3.11569611 |
| P22105 | Tenascin-X | TNXB | 0.01465321 | 1.2352615 | 2.35424016 |
| Q13554 | Calcium/calmodulin-dependent protein kinase type II subunit beta | CAMK2B | 0.00450853 | 1.11055773 | 2.15929107 |
| P48729 | Casein kinase I isoform alpha | CSNK1A1 | 0.02198435 | 0.80846833 | 1.75135109 |
| Q08209 | Serine/threonine-protein phosphatase 2B catalytic subunit alpha isoform | PPP3CA | 0.01030076 | 0.77359266 | 1.70952162 |
| P06213 | Insulin receptor | INSR | 0.00268412 | 0.68872007 | 1.61185288 |
| P62879 | Guanine nucleotide-binding protein G(I)/G(S)/G(T) subunit beta-2 | GNB2 | 0.02259912 | 0.58721439 | 1.50234316 |
| P62873 | Guanine nucleotide-binding protein G(I)/G(S)/G(T) subunit beta-1 | GNB1 | 0.0325862 | 0.51669889 | 1.43067788 |
| P01116 | GTPase KRas | KRAS | 0.03849946 | 0.3209804 | 1.24917915 |
| Q9BZK7 | F-box-like/WD repeat-containing protein TBL1XR1 | TBL1XR1 | 0.02823104 | 0.28013326 | 1.21430705 |
| P61981 | 14-3-3 protein gamma | YWHAG | 0.04837044 | -0.3536454 | 0.78260412 |
| Q9Y265 | RuvB-like 1 | RUVBL1 | 0.0088934 | -0.6241283 | 0.64881168 |
| Q00534 | Cyclin-dependent kinase 6 | CDK6 | 0.00034273 | -0.6506689 | 0.63698493 |
| P08238 | Heat shock protein HSP 90-beta | HSP90AB1 | 0.04736631 | -0.6830467 | 0.62284854 |
| Q13753 | Laminin subunit gamma-2 | LAMC2 | 0.01070964 | -1.7138151 | 0.30485285 |
| Q8TDB6 | E3 ubiquitin-protein ligase DTX3L | DTX3L | 0.0186206 | -2.070242 | 0.23811955 |
| P01033 | Metalloproteinase inhibitor 1 | TIMP1 | 0.04598185 | -3.6006206 | 0.08243378 |
| P35442 | Thrombospondin-2 | THBS2 | 0.00435699 | -4.8146977 | 0.03553297 |
| **Ca-P** | P63104 | 14-3-3 protein zeta/delta | YWHAZ | 0.00445246 | 0.79350566 | 1.73328111 |
| P04626 | Receptor tyrosine-protein kinase erbB-2 | ERBB2 | 0.04994159 | 3.73757007 | 13.3389211 |
| P01033 | Metalloproteinase inhibitor 1 | TIMP1 | 0.0086764 | 2.03684489 | 4.10347139 |
| Q8TDB6 | E3 ubiquitin-protein ligase DTX3L | DTX3L | 0.03665207 | 1.85376884 | 3.61443173 |
| Q9Y265 | RuvB-like 1 | RUVBL1 | 0.00011073 | 0.95521689 | 1.93887109 |
| P08238 | Heat shock protein HSP 90-beta | HSP90AB1 | 0.0492703 | 0.77892499 | 1.71585185 |
| P31946 | 14-3-3 protein beta/alpha | YWHAB | 0.02212687 | 0.56530638 | 1.47970171 |
| Q16543 | Hsp90 co-chaperone Cdc37 | CDC37 | 0.02628445 | 0.52934462 | 1.4432734 |
| P62753 | 40S ribosomal protein S6 | RPS6 | 0.00222191 | 0.5080116 | 1.42208884 |
| Q13547 | Histone deacetylase 1 | HDAC1 | 0.01465123 | 0.45668443 | 1.37238421 |
| P67870 | Casein kinase II subunit beta | CSNK2B | 0.00080324 | 0.39973632 | 1.31926677 |
| P09619 | Platelet-derived growth factor receptor beta | PDGFRB | 0.01313181 | -0.9750334 | 0.50872808 |
| P26006 | Integrin alpha-3 | ITGA3 | 0.02093871 | -1.3586626 | 0.38994361 |
| P12111 | Collagen alpha-3(VI) chain | COL6A3 | 0.02663608 | -1.5173139 | 0.34933574 |
| P12110 | Collagen alpha-2(VI) chain | COL6A2 | 0.01738169 | -1.599007 | 0.33010411 |
| P12109 | Collagen alpha-1(VI) chain | COL6A1 | 0.01611551 | -1.6925379 | 0.3093822 |
| P59768 | Guanine nucleotide-binding protein G(I)/G(S)/G(O) subunit gamma-2 | GNG2 | 0.00023754 | -1.7385132 | 0.29967835 |
| Q6NZI2 | Caveolae-associated protein 1 | CAVIN1 | 0.02873515 | -1.8065833 | 0.28586715 |
| P35558 | Phosphoenolpyruvate carboxykinase, cytosolic [GTP] | PCK1 | 0.03906118 | -2.2261106 | 0.21373416 |
| P55268 | Laminin subunit beta-2 | LAMB2 | 0.01172276 | -2.2903454 | 0.20442656 |
| P07585 | Decorin | DCN | 0.00926567 | -2.469634 | 0.18053695 |
| P22105 | Tenascin-X | TNXB | 0.02155248 | -3.6571128 | 0.07926826 |
| **Ca-Liver** | Q13363 | C-terminal-binding protein 1 | CTBP1 | 0.04893731 | 0.86187974 | 1.81740473 |
| Q13573 | SNW domain-containing protein 1 | SNW1 | 0.00097181 | 1.86044545 | 3.63119763 |
| P67870 | Casein kinase II subunit beta | CSNK2B | 0.0270764 | 0.50270827 | 1.41687086 |
| Q9BZK7 | F-box-like/WD repeat-containing protein TBL1XR1 | TBL1XR1 | 0.00523334 | 0.49855652 | 1.41279929 |
| P35558 | Phosphoenolpyruvate carboxykinase, cytosolic [GTP] | PCK1 | 0.04449634 | -2.794427 | 0.14414303 |
| P04004 | Vitronectin | VTN | 0.0296544 | -2.0206647 | 0.24644461 |
